# Supplementary material for: Improving Malaria Case Management and Referral Relationships at the Primary Care Level in Ghana: Evaluation of a Quality Assurance Internship
Source: PubMed Central journal article supplement (PMC10749655; doi:10.9745/ghsp-d-23-00050), 2023-12-22
Supplement: GHSP-D-23-00050-Supplements.pdf [file GHSP-D-23-00050-Supplements.pdf]

**Supplement to:** Asiedu A, Haws R, Gyasi A, et al. Improving malaria case management and referral relationships at the primary care level in Ghana: evaluation of a quality assurance internship. *Glob Health Sci Pract.* 2023;11(6):e2300050. <https://doi.org/10.9745/GHSP-D-23-00050>

## **Supplement Files**

### **Pre-Course Assessment**

### **Competency Checklist**

### **Post-Training Mentoring Tool**

### **Table S1. HMIS Data Elements and Definitions**

### **Table S2. Malaria Indicators Using HMIS Data Elements**

PRE-COURSE ASSESSMENT

CHO INTERNSHIP TRAINING

Name:.....

Facility Name:.....

Date:

Cadre:

---

**INSTRUCTIONS: Please select ONE best answer ONLY for each question**

**Questions:**

1. The following three are common symptoms of uncomplicated malaria.
  - a. Fever, headache, body pains
  - b. Fever, cough, convulsion
  - c. Headache confusion, vomiting
  - d. Fever, vomiting everything, refusing to eat
  
2. The following are recommended medicines or combination of medicines for the treatment of uncomplicated malaria in Ghana.
  - a. Sulphadoxine-Pyrimethamine
  - b. Artesunate-Amodiaquine
  - c. Artemether- Lumefantrine
  - d. Dihydroartemisin-Pipepraquine
  - e. Quinine-Clindamycin Combination
  - f. All above
  - g. All except A.
  
3. The medicines indicated below can be used for treatment in case of malaria treatment failure for uncomplicated malaria?
  - a. Quinine Injection
  - b. Artemether Injection
  - c. Artesunate Injection
  - d. Any of the ACTs other than the one used for the initial treatment
  - e. Artesunate suppository
  
4. The following defines severe malaria?
  - a. Malaria with no vital organ failure
  - b. Medical emergency with plasmodium malariae present in the blood
  - c. Any Febrile illness with vital organ failure
  - d. Confirmed malaria with life threatening complication(s)
  - e. Confirmed malaria with more than two life threatening complication(s)
  
5. The following group(s) of people in the population are most likely to develop severe malaria?
  - a. People in rural areas

- b. Children under below five years of age
  - c. Pregnant women
  - d. Travelers from non-endemic areas
  - e. a,b,c
  - f. b,c,d
  - g. a,b,c,d
6. The following disease condition does not present with symptoms which are similar to uncomplicated malaria especially in children?
- a. Acute Respiratory tract infections
  - b. Urinary Tract Infections
  - c. Otitis Media
  - d. Typhoid Fever
  - e. Asthma
7. These factors or reasons account for why people with malaria may die?
- a. Delay in seeking treatment
  - b. Poor or incomplete treatment leading to severe malaria
  - c. Financial challenges
  - d. Use of non-recommended or ineffective medicines
  - e. a and b only
  - f. b and d only
  - g. a,b,c,d
8. The following steps are used to manage a child below 5 years who has a febrile illness
- a. Take a good history to exclude all possible causes of fever
  - b. Take a good history and give anti-malaria medicine
  - c. If the child has fever and malaria with a life threatening condition is suspected, manage as uncomplicated malaria
  - d. a and d only
  - e. If you suspect malaria, do a test, treat and track
  - f. All Above
9. The following are all common complications of Severe Malaria
- a. Fever, Loss of appetite, convulsion, headache, anaemia
  - b. Hypoglycaemia, severe anaemia, convulsions, Jaundice, splenomegaly
  - c. Hypoglycaemia, severe anaemia, convulsions, haemoglobinuria, difficulty in breathing
  - d. Difficulty in breathing, severe anaemia, general body pains, headache convulsion
10. The 5 “General Danger Signs” in a sick child include

- a. Loss of appetite, vomiting everything, history of convulsion in current illness, convulsion now, lethargic/unconscious
  - b. Not able to feed or breastfeed, difficulty in breathing, history of convulsion in current illness, convulsion now, lethargic/unconscious
  - c. Not able to feed or breastfeed, vomiting everything, severe dehydration, convulsion now, lethargic/unconscious
  - d. Not able to feed or breastfeed, vomiting everything, history of convulsion in current illness, convulsion now, lethargic/unconscious
11. The following is true of parenteral anti-malaria medicines used in the management of severe malaria:
- a. Injection artesunate b. Injection Quinine c. Rectal Artesunate, d. Dihydroartemisinin-Piperaquine e. Inj Artemether
- a. a only
  - b. b only
  - c. a and c only
  - d. a, b and e only
  - e. All
12. The following is true of parenteral anti-malaria medicines used in the management of severe malaria in the first trimester of pregnancy:
- a. Injection Artesunate b. Injection Quinine c. Rectal Artesunate, d. Dihydroartemisinin Piperaquine e. Inj. Artemether
- a. a and b only
  - b. a only
  - c. b only
  - d. a, b, e only
  - e. all
13. The following is true of parenteral anti-malaria medicines used in the management of severe malaria in the second and third trimesters of pregnancy:
- a. Injection Artesunate b. Injection Quinine c. Rectal Artesunate, d. Dihydroartemisinin Piperaquine e. Inj. Artemether
- a. a only
  - b. b only
  - c. a and c only
  - d. a, b and e only
  - e. all
14. The Rectal artesunate is indicated as pre-referral medicine for severe malaria in which age category of patients
- a. All patients
  - b. Children below 5 years
  - c. Children below 6 years or weight < 25 kg

- d. Pregnant women only
  - e. Patients above 6 years only
15. The recommended dose and the schedule for Inj. Artesunate for the management of severe malaria in a child less than 20 kg is
- a. 2.4mg/kg body weight at time 0, 12 hours, 24 hours then every 24hrs for up to 7 days
  - b. 3.0 mg/kg body weight at time 0 and 24 hours then every 24hrs for up to 7 days
  - c. 2.4mg/kg body weight at time 0, 12 hours, 24 hours then every 12hrs for up to 7 days
  - d. 3.0mg/kg body weight at time 0, 12 hours, 24 hours then every 24hrs for up to 7 days
  - e. 3.0 mg/kg body weight at time 0, 12 hours, 24 hours then every 12 hours for up to 7 days
16. The recommended dose and the schedule for Injection Artesunate for the management of severe malaria for a patient  $\geq 20$  kg is
- a. 2.4mg/kg body weight at time 0, 12 hours, 24 hours then every 24hrs for up to 7 days
  - b. 3.0 mg/kg body weight at time 0, 24 hours then every 24hrs for up to 7 days
  - c. 2.4mg/kg body weight at time 0, 12 hours, 24 hours then every 12hrs for up to 7 days
  - d. 3.0mg/kg body weight at time 0, 12 hours, 24 hours then every 24hrs for up to 7 days
  - e. 2.4 mg/kg body weight at time 0, 12 hours, 24 hours then every 24hrs for up to 5 days
17. How long can reconstituted and diluted Artesunate for injection be stored?
- a. 30 minutes
  - b. 60 minutes
  - c. Up to 4 hours
  - d. 24 hours
  - e. No time restriction as long as it is stored in a fridge
18. How many hours after the last parenteral Artesunate dose should the first oral dose follow on treatment be given?
- a. After 12 hours up to 24 hours
  - b. Between 4 and 12 hours
  - c. At 24 hours
  - d. Any time after 24 hours
19. In a child with severe malaria with convulsion, after assessing and securing the airway, the next most important actions is to
- a. Stop convulsion by administering anti-convulsant
  - b. Tepid sponge the patient
  - c. Give 1<sup>st</sup> dose of recommended anti-malaria
  - d. Check blood glucose and first manage for hypoglycaemia if hypoglycaemic

e. Re-assure the care taker

20. Dosage regimen for Parenteral Diazepam for managing convulsion in children is

- a. IV Diazepam 0.25mg/kg (maximum 10mg per dose) to be repeated up to 1 dose
- b. IV Diazepam 0.5mg/kg (maximum 10mg per dose) to be repeated up to 1 dose
- c. IV Diazepam 10mg stat repeat prn
- d. IV Diazepam 0.1mg/kg stat

21. What is the threshold of Blood Glucose that requires intervention?

- a. Blood Glucose < 5.0 mmol/l
- b. Blood Glucose < 3.0 mmol/l
- c. Blood Glucose < 2.2 mmol/l
- d. Blood Glucose <4.0 mmol/l

22. The following describes how hypoglycaemia is managed

- a. 10% Dextrose at 10mls/kg bolus
- b. 5% Dextrose at 2 – 4mls/kg bolus; follow-up with IV Infusion containing 5 – 10% dextrose at 5ml/kg per hour.
- c. 10% Dextrose at 2 – 4mls/kg bolus, Follow-up with IV Infusion containing 5 – 10% dextrose at 5ml/kg per hour
- d. 15% Dextrose at 2 – 4mls/kg bolus; Follow-up with IV Infusion containing 5 – 10% dextrose at 5ml/kg per hour

### COMMUNITY HEALTH OFFICER ATTACHMENT PROGRAMME

Checklist to assess competency of lower level health staff in febrile case management

Common illnesses to assess: malaria, respiratory tract infections, gastrointestinal infections, Ear nose and throat infections, mouth and gum disorders, urinary tract infections and sexually transmitted infections and skin infections

REGION.....DISTRICT.....

CHO attachment Health facility.....Facility type: Hospital [ ] Polyclinic [ ] Health Centre [ ]

Name of Observer ..... Designation .....

Contact number and email: .....

Details of health worker undertaking attachment in febrile case management

|                                    |            |           |                |                |            |          |
|------------------------------------|------------|-----------|----------------|----------------|------------|----------|
| <b>Health facility (s)he works</b> |            |           |                |                |            |          |
| <b>FACILITY TYPE</b>               | CHPS       | CLINIC    | MATERNITY HOME | HEALTH CENTRE  | POLYCLINIC | HOSPITAL |
| <b>FACILITY OWNERSHIP</b>          | QUASI-GOVT | GOVT      |                | MISSION (CHAG) | PRIVATE    | OTHER    |
| <b>NAME OF HEALTH WORKER</b>       |            |           |                |                |            |          |
| <b>Contact phone and email</b>     |            |           |                |                |            |          |
| <b>CADRE OF STAFF</b>              | CHO/CHN    | EN/RN/SRN | PA/MA          | MD             | MIDWIFE    | OTHER    |

**Patient data (Score – 2 for complete)**

Age of Patient:.....Sex of Patient:.....Weight: .....

## Assessment

|                                                       | ASK                                                                                                                                                                                                                                                                                                                                                                                                                                                                                                                                                                                                                                                                                                   | LOOK, LISTEN and FEEL                                                                                                                                                                                                                                                                                                                                                                                                                                                                                                                                                                                                                     | Remarks                                                                                                                                        |
|-------------------------------------------------------|-------------------------------------------------------------------------------------------------------------------------------------------------------------------------------------------------------------------------------------------------------------------------------------------------------------------------------------------------------------------------------------------------------------------------------------------------------------------------------------------------------------------------------------------------------------------------------------------------------------------------------------------------------------------------------------------------------|-------------------------------------------------------------------------------------------------------------------------------------------------------------------------------------------------------------------------------------------------------------------------------------------------------------------------------------------------------------------------------------------------------------------------------------------------------------------------------------------------------------------------------------------------------------------------------------------------------------------------------------------|------------------------------------------------------------------------------------------------------------------------------------------------|
| <b>General danger sign or signs of severe disease</b> | <ol style="list-style-type: none"> <li>1. Unable to drink or breastfeed</li> <li>2. vomiting everything</li> <li>3. History of convulsion in current illness</li> <li>4. and/or Any symptoms of severe disease               <ol style="list-style-type: none"> <li>a. Dark coloured urine (have look at sample)</li> <li>b. Severe pallor (conjunctiva, palm, lips)</li> <li>c. High temperature (<math>\geq 37.4</math> for newborn) and <math>\geq 38.5^{\circ}\text{C}</math>)</li> <li>d. Hypothermia (low temperature <math>\leq 35.5^{\circ}\text{C}</math> especially in newborn)</li> <li>e. Fast breathing; chest in-drawing</li> <li>f. Signs of Severe dehydration</li> </ol> </li> </ol> | <ol style="list-style-type: none"> <li>1. lethargy or Unconscious</li> <li>2. convulsion now</li> <li>3. and/or Any signs of severe disease</li> </ol>                                                                                                                                                                                                                                                                                                                                                                                                                                                                                    | <b>Score 10 Max</b> <ol style="list-style-type: none"> <li>a. Assess General Danger Signs – 5</li> <li>b. Signs of severe disease 5</li> </ol> |
| Fever                                                 | History of fever? Yes [ ] No [ ]<br>If yes, <ul style="list-style-type: none"> <li>- how long? Yes [ ] No [ ]</li> <li>- any other problem? Yes [ ] No [ ]</li> <li>- medications taken? Yes [ ] No [ ]</li> </ul>                                                                                                                                                                                                                                                                                                                                                                                                                                                                                    | Ask the health worker what (s)he would look out for or do (tick)? <ul style="list-style-type: none"> <li>- measure temperature? Yes [ ] No [ ]</li> <li>- lethargy?</li> <li>- confusion/ convulsion?</li> <li>- stiff neck</li> </ul>                                                                                                                                                                                                                                                                                                                                                                                                    | Score 5 for correct assessment                                                                                                                 |
| Acute Respiratory Infections                          | Did health staff ask of cough or difficulty in breathing? Yes [ ] No [ ]<br>If yes, did health worker ask the following? <ul style="list-style-type: none"> <li>- for how long? Yes [ ] No [ ]</li> <li>- sputum or no sputum? Yes [ ] No [ ]</li> </ul> If productive cough, blood in sputum? Yes [ ] No [ ] <ul style="list-style-type: none"> <li>- chest pain? Yes [ ] No [ ]</li> <li>- night sweats? Yes [ ] No [ ]</li> <li>- smoking history? Yes [ ] No [ ]</li> <li>- Drug history for any chest infection? Yes [ ] No [ ]</li> </ul> Did health worker ask of:                                                                                                                             | Did health staff look and listen for following? <ul style="list-style-type: none"> <li>- count breaths in one minute? Yes [ ] No [ ]               <ul style="list-style-type: none"> <li>o Ask Respiratory rate for fast Breathing (different age groups)</li> </ul> </li> <li>- Difficulty in breathing Yes [ ] No [ ]               <ul style="list-style-type: none"> <li>o wheezing?</li> <li>o chest indrawing?</li> <li>o intercostal recession,</li> <li>o flaring ala nasae, Yes [ ] No [ ]</li> <li>o Stridor – demonstrate</li> </ul> </li> <li>- Count pulse? Yes [ ] No [ ]</li> <li>- Measure BP? Yes [ ] No [ ]</li> </ul> | Score 10 for complete assessment                                                                                                               |



|                     | ASK                                                                                                                                                                                                                                                                                                                                                                                                                                                                                                     | LOOK, LISTEN and FEEL                                                                                                                                                                                                                                                                                                                                                                                                                                                                                                                                                                                                                        | Remarks                          |
|---------------------|---------------------------------------------------------------------------------------------------------------------------------------------------------------------------------------------------------------------------------------------------------------------------------------------------------------------------------------------------------------------------------------------------------------------------------------------------------------------------------------------------------|----------------------------------------------------------------------------------------------------------------------------------------------------------------------------------------------------------------------------------------------------------------------------------------------------------------------------------------------------------------------------------------------------------------------------------------------------------------------------------------------------------------------------------------------------------------------------------------------------------------------------------------------|----------------------------------|
|                     | <ul style="list-style-type: none"> <li>- stuffy/ running nose or catarrh? Yes [ ] No [ ]</li> </ul>                                                                                                                                                                                                                                                                                                                                                                                                     |                                                                                                                                                                                                                                                                                                                                                                                                                                                                                                                                                                                                                                              |                                  |
| Mouth<br>And<br>ENT | <p>Did health worker ask for the following?</p> <ul style="list-style-type: none"> <li>- pain in throat Yes [ ] No [ ]</li> <li>- problems swallowing? Yes [ ] No [ ]</li> <li>- problems chewing? Yes [ ] No [ ]</li> </ul>                                                                                                                                                                                                                                                                            | <p>Did health worker look into the mouth of client? Yes [ ] No [ ]</p> <p>If yes, ask health worker to mention what (s)he is looking for in mouth (abnormalities)</p> <ul style="list-style-type: none"> <li>- tooth problems? Yes [ ] No [ ]</li> <li>- swollen gums? Yes [ ] No [ ]</li> <li>- bleeding from gums? Yes [ ] No [ ]</li> <li>- white patches? Yes [ ] No [ ]</li> <li>- red pharynx? Yes [ ] No [ ]</li> <li>- tonsils (big/ pus)? Yes [ ] No [ ]</li> </ul> <p>Others</p> <ul style="list-style-type: none"> <li>- swelling in jaw? Yes [ ] No [ ]</li> <li>- feel for enlarged neck lymph nodes? Yes [ ] No [ ]</li> </ul> | Score 10 for complete assessment |
|                     | <p>Ear pain or discharge? Yes [ ] No [ ]</p> <p>If yes to, which ear? Yes [ ] No [ ]</p>                                                                                                                                                                                                                                                                                                                                                                                                                | <p>Did health worker assess for</p> <ul style="list-style-type: none"> <li>- pain: by pulling the ear lobe? Yes [ ] No [ ]</li> <li>- discharge? Yes [ ] No [ ]</li> </ul>                                                                                                                                                                                                                                                                                                                                                                                                                                                                   |                                  |
| Diarrhoea           | <p>Did health worker ask of diarrhea? Yes [ ] No [ ]</p> <p>If yes,</p> <ul style="list-style-type: none"> <li>- how long? Yes [ ] No [ ]</li> <li>- is there an outbreak of diarrhea in client's community? Yes [ ] No [ ]</li> <li>- is client on treatment for diarrhea? Yes [ ] No [ ]</li> </ul> <p>Did health worker ask for abdominal pain? Yes [ ] No [ ]</p> <p>Did health worker ask of abdominal swelling? Yes [ ] No [ ]</p> <p>Did health worker ask of blood in stool? Yes [ ] No [ ]</p> | <p>Ask health worker to demonstrate how to assess for dehydration. Were the following assessed correctly</p> <ul style="list-style-type: none"> <li>- skin pinch? Yes [ ] No [ ]</li> <li>- sunken eyes? Yes [ ] No [ ]</li> <li>- thirst? Yes [ ] No [ ]</li> <li>- Correctly classify the diarrhoea</li> </ul>                                                                                                                                                                                                                                                                                                                             | Score – 10 max                   |

|                              | ASK                                                                                                                                                                                                                                                                                                                                                                                                                                                                                                                                                                                                                                                                                                                                                                                                                       | LOOK, LISTEN and FEEL                                                                                                                                                                                                                                                                                                                             | Remarks      |
|------------------------------|---------------------------------------------------------------------------------------------------------------------------------------------------------------------------------------------------------------------------------------------------------------------------------------------------------------------------------------------------------------------------------------------------------------------------------------------------------------------------------------------------------------------------------------------------------------------------------------------------------------------------------------------------------------------------------------------------------------------------------------------------------------------------------------------------------------------------|---------------------------------------------------------------------------------------------------------------------------------------------------------------------------------------------------------------------------------------------------------------------------------------------------------------------------------------------------|--------------|
| Genito-urinary               | <p>Does health worker ask of</p> <ul style="list-style-type: none"> <li>- burning or pain on urination? Yes [ ] No [ ] <ul style="list-style-type: none"> <li>o If yes, how long? Yes [ ] No [ ]</li> </ul> </li> <li>- increased frequency of urination? Yes [ ] No [ ]</li> <li>- flank pain? Yes [ ] No [ ]</li> <li>- sores or swelling in genital or anal area? Yes [ ] No [ ]</li> </ul> <p>In females:</p> <ul style="list-style-type: none"> <li>- abnormal vaginal discharge? Yes [ ] No [ ]</li> <li>- last menstrual period or menses last month? Yes [ ] No [ ]</li> </ul> <p>In males:</p> <ul style="list-style-type: none"> <li>- urethral discharge? Yes [ ] No [ ]</li> <li>- scrotal pain or swelling? Yes [ ] No [ ]</li> </ul> <p>In all sexually active patients, sexual history? Yes [ ] No [ ]</p> | <p>Ask health worker, what would you do if one of these symptoms is present?</p>                                                                                                                                                                                                                                                                  | Score 10     |
| Nutrition status and anaemia | <p>Did health worker Ask</p> <ul style="list-style-type: none"> <li>- for weight loss? Yes [ ] No [ ]</li> <li>- diet history? Yes [ ] No [ ]</li> <li>- alcohol use? Yes [ ] No [ ]</li> </ul> <p>If pallor, did health worker ask</p> <ul style="list-style-type: none"> <li>- black/ dark stools? Yes [ ] No [ ]</li> <li>- blood in stool? Yes [ ] No [ ]</li> <li>- blood in urine? Yes [ ] No [ ]</li> <li>- in menstruating females, heavy menstrual period? Yes [ ] No [ ]</li> </ul>                                                                                                                                                                                                                                                                                                                             | <p>Did health worker look for/ document</p> <ul style="list-style-type: none"> <li>- visible wasting?</li> <li>- oedema? Yes [ ] No [ ]</li> <li>- check weight of client? Yes [ ] No [ ]</li> </ul> <p>Did health worker assess patient for</p> <ul style="list-style-type: none"> <li>- pallor (palmer/conjunctival)? Yes [ ] No [ ]</li> </ul> | Score Max 10 |
| Skin                         | <p>Did health worker ask of</p> <ul style="list-style-type: none"> <li>- sores or swelling on skin or other skin problem? Yes [ ] No [ ]</li> <li>- If a sore or swelling, is there discharge? Yes [ ] No [ ]</li> <li>- is there pain? Yes [ ] No [ ]</li> <li>- is client on treatment? Yes [ ] No [ ]</li> </ul>                                                                                                                                                                                                                                                                                                                                                                                                                                                                                                       | <p>Ask health worker to demonstrate how to assess</p>                                                                                                                                                                                                                                                                                             | Max Score 3  |

|                                                  | ASK                                                                                             | LOOK, LISTEN and FEEL | Remarks     |
|--------------------------------------------------|-------------------------------------------------------------------------------------------------|-----------------------|-------------|
| Medical history                                  | Medical history<br>- asthma? Yes [ ] No [ ]<br>- hypertension or heart disorder? Yes [ ] No [ ] |                       | Max Score 2 |
| Investigation                                    | Orders appropriate Lab Investigation<br>Fever – RDT for Malaria<br>Anaemia – Hb                 |                       | Max Score 3 |
| Correctly Diagnosis or Classification of Disease |                                                                                                 |                       | Score 5     |

## **Malaria Case Management Post-Training Mentoring Tool**

### **General Instructions**

#### **A. Before visit:**

1. Review previous visit findings and recommendations (if any)
2. Review facility Malaria DHIMS Data
3. Notify the facility at least One week before the scheduled visit and remind a day before the visit
4. Make available to the Facility the monitoring tool and all other tools to be used during the visit

#### **B. During the Visit:**

1. Entry Interview - The supervisory team should first meet with the Facility Management, Clinical Coordinator and Ward in-charges involved in the Malaria training to discuss the follow-up from the training as well as any system changes that have been implemented since the training or the last visit.
2. Following that group discussion, the team should divide responsibilities, if possible visit the various units participating in the training
  - i. Assess facility preparedness for managing malaria
  - ii. Review and document process maps prepared
  - iii. Review and document PDSA prepared
  - iv. Support teams to prepare action plans based on findings
3. The results of the assessment should be shared with the clinic staff at the end.

#### **C. Before Exit**

1. Exit Conference with management and Team
2. Agree on action plan and Follow-up Plan

- D.** Prepare and Submit written technical report to the Facility within a maximum 2 weeks after visit

### **Facility Details**

Region: ..... District: ..... Facility Name: .....

Facility Type: ..... Facility Ownership: ..... Date of Training: .....

Date of First Follow-up visit: ..... Date of Last Follow-up visit: .....

Date of Current visit: ..... Start Time: ..... End Time: .....

**Units visited:** (Tick ✓ All): 1. OPD 2. Paediatric Ward 3. Maternity Ward 4. Laboratory 5. Pharmacy 6. ANC  
7. Male Medical 8. Female Medical 9. District Health Directorate 10. HI Unit 11. Any Other Unit (Specify).....

**A. Supervisors' Details**

| Name | Position | Contact Number/E-mail |
|------|----------|-----------------------|
|      |          |                       |
|      |          |                       |
|      |          |                       |

**B. Contacts During the Visit**

| Unit                 | Contact person | Position | Phone number |
|----------------------|----------------|----------|--------------|
| Management           |                |          |              |
| OPD                  |                |          |              |
| Emergency Ward       |                |          |              |
| Paediatric ward      |                |          |              |
| Maternity Ward       |                |          |              |
| Laboratory           |                |          |              |
| Other unit (specify) |                |          |              |

**C. Review facility Malaria DHIMS Data (Pre-visit)**

| Month | Malaria Admissions | Malaria Deaths | U5 CFR | % Uncomplicated malaria suspected tested | % suspected uncomplicated malaria not tested but treated as malaria | % Confirmed uncomplicated malaria cases treated with ACTs | ANC registrants | No. of Pregnant women given IPTp 1 | No. of Pregnant women given IPTp 3 | IPTp 1 coverage | IPTp 3 coverage |
|-------|--------------------|----------------|--------|------------------------------------------|---------------------------------------------------------------------|-----------------------------------------------------------|-----------------|------------------------------------|------------------------------------|-----------------|-----------------|
| Jan   |                    |                |        |                                          |                                                                     |                                                           |                 |                                    |                                    |                 |                 |
| Feb   |                    |                |        |                                          |                                                                     |                                                           |                 |                                    |                                    |                 |                 |
| Mar   |                    |                |        |                                          |                                                                     |                                                           |                 |                                    |                                    |                 |                 |
| Apr   |                    |                |        |                                          |                                                                     |                                                           |                 |                                    |                                    |                 |                 |
| May   |                    |                |        |                                          |                                                                     |                                                           |                 |                                    |                                    |                 |                 |
| Jun   |                    |                |        |                                          |                                                                     |                                                           |                 |                                    |                                    |                 |                 |
| Jul   |                    |                |        |                                          |                                                                     |                                                           |                 |                                    |                                    |                 |                 |
| Aug   |                    |                |        |                                          |                                                                     |                                                           |                 |                                    |                                    |                 |                 |
| Sep   |                    |                |        |                                          |                                                                     |                                                           |                 |                                    |                                    |                 |                 |
| Oct   |                    |                |        |                                          |                                                                     |                                                           |                 |                                    |                                    |                 |                 |
| Nov   |                    |                |        |                                          |                                                                     |                                                           |                 |                                    |                                    |                 |                 |
| Dec   |                    |                |        |                                          |                                                                     |                                                           |                 |                                    |                                    |                 |                 |

**D. Assessment of Facility**

1. Availability of Treatment Protocols and Wallcharts – Visit follow Service Delivery Points and assess for the following (Indicate Yes/No/Non-Applicable(N/A))

| SN | Job-Aids (Protocols/Charts/Manuals)                   | OPD | Emergency | Paediatric Ward | Maternity Ward | ANC |
|----|-------------------------------------------------------|-----|-----------|-----------------|----------------|-----|
| 1  | Flow chart for the diagnosis and treatment of malaria |     |           |                 |                |     |
| 2  | Artesunate IV/IM administration poster                |     |           |                 |                |     |
| 3  | Artesunate-Lumefantrine Dosing Schedule               |     |           |                 |                |     |
| 4  | Artesunate-Amodiaquine Dosing Schedule                |     |           |                 |                |     |
| 5  | Rectal Artesunate Dosing Schedule                     |     |           |                 |                |     |
| 6  | Management of Convulsion                              |     |           |                 |                |     |
| 7  | Management of Hypoglycaemia                           |     |           |                 |                |     |
| 8  | IPTp-SP Administration Guide                          |     |           |                 |                |     |
|    | <b>Malaria Indicators Wallcharts</b>                  |     |           |                 |                |     |
| 1  | Outpatient Malaria Indicator Monitoring Chart         |     |           |                 |                |     |
| 2  | ACT Adherence Monitoring Chart                        |     |           |                 |                |     |
| 3  | Inpatient Malaria Indicator Monitoring Chart          |     |           |                 |                |     |
| 4  | IPTp and ITN Indicator Monitoring Chart               |     |           |                 |                |     |

**2. Availability of Anti-Malaria Medicines and Other Medicines/Items for Malaria Management at the Facility**

| Medicine                | In Stock today (Yes/No/EXPIRED) | Out of stock more than 7 days in past 3 months? (Y/N) | If Yes for how many days? |
|-------------------------|---------------------------------|-------------------------------------------------------|---------------------------|
| Inj Artesunate (60mg)   |                                 |                                                       |                           |
| Inj Other mg Artesunate |                                 |                                                       |                           |
| Inj. Artemether         |                                 |                                                       |                           |
| Inj Quinine             |                                 |                                                       |                           |
| Tab. Quinine            |                                 |                                                       |                           |
| Tab. A-L                |                                 |                                                       |                           |
| Tab. A-A                |                                 |                                                       |                           |
| Inj Diazepam            |                                 |                                                       |                           |
| Inj Phenobarb           |                                 |                                                       |                           |
| 10% Dextrose            |                                 |                                                       |                           |
| 5% dextrose             |                                 |                                                       |                           |
| R/Lactate/N-Saline      |                                 |                                                       |                           |
| Blood Giving Set        |                                 |                                                       |                           |
| Blood at Blood Bank     |                                 |                                                       |                           |
| RDT Test Kit            |                                 |                                                       |                           |

3. Availability of Availability of Functional Equipment and health Commodities for Emergency Care (Indicate Yes – Functional; Yes – Non-functional; No; Expired; NA)

| COMMODITY                | OPD | Em. Ward | Paed Ward | Mat. Ward |
|--------------------------|-----|----------|-----------|-----------|
| Thermometer              |     |          |           |           |
| Sphygmomanometer – Adult |     |          |           |           |
| Weighing Scale           |     |          |           |           |
| IV Cannula – <b>Paed</b> |     |          |           |           |
| IV Cannula <b>Adult</b>  |     |          |           |           |
| Syringes & Needles       |     |          |           |           |
| IV Giving Set            |     |          |           |           |
| Glucometer               |     |          |           |           |
| Oxygen                   |     |          |           |           |
| Pulse Oximeter           |     |          |           |           |
| Suction Machine          |     |          |           |           |

#### 4. Availability of Laboratory Services (Indicate Yes/No)

| Test                                                            | Availability | Any Comment? |
|-----------------------------------------------------------------|--------------|--------------|
| Hb                                                              |              |              |
| FBC                                                             |              |              |
| Sickling                                                        |              |              |
| Blood film for Malaria Parasites (Thick and Thin)               |              |              |
| Malaria RDT (Indicate points of use and monitoring in comments) |              |              |
| G-6PD Screen                                                    |              |              |
| Blood Glucose                                                   |              |              |
| LFT                                                             |              |              |
| BUE & Cr                                                        |              |              |
| Blood Grouping and Cross-matching                               |              |              |

E. Assessment, monitoring and management of Severe Malaria. Randomly Select Five Severe malaria cases Folder after April 2019 and assess for the following and score as appropriate (Indicate Yes; Yes – timely and complete; Yes – Incomplete/not timely; no)

| No. | Assess for Complications | Temp Timely | Resp. Rate (timely) | Pulse Rate Timely | Treatment Chart (Timely & Complete) | Time to initiate treatment after admission (minutes) | Anti-Malaria Used | Anti-malarial Medication Administered Per guidelines | Malaria test Results (Positive, Negative, Not done) | Compliance with malaria Negative test results (yes/No) |
|-----|--------------------------|-------------|---------------------|-------------------|-------------------------------------|------------------------------------------------------|-------------------|------------------------------------------------------|-----------------------------------------------------|--------------------------------------------------------|
|     |                          |             |                     |                   |                                     |                                                      |                   |                                                      |                                                     |                                                        |
|     |                          |             |                     |                   |                                     |                                                      |                   |                                                      |                                                     |                                                        |
|     |                          |             |                     |                   |                                     |                                                      |                   |                                                      |                                                     |                                                        |
|     |                          |             |                     |                   |                                     |                                                      |                   |                                                      |                                                     |                                                        |
|     |                          |             |                     |                   |                                     |                                                      |                   |                                                      |                                                     |                                                        |
|     |                          |             |                     |                   |                                     |                                                      |                   |                                                      |                                                     |                                                        |



**F. Review Action Plans Developed by Trainees**

1. Are the PDSA prepared by the teams completed and available (document in Table below

| Unit       | Change Idea Developed | PDSA (Available complete; incomplete; no PDSA | Status of Implementation |
|------------|-----------------------|-----------------------------------------------|--------------------------|
| OPD        |                       |                                               |                          |
| ER         |                       |                                               |                          |
| Paediatric |                       |                                               |                          |
| Maternity  |                       |                                               |                          |
| Laboratory |                       |                                               |                          |
| ANC        |                       |                                               |                          |

2. Are the action plans (PDSA) developed by the team during the training shared with their immediate Supervisor/Ward in-charge?  Yes  No

a. If no, why?

- i. ....
- ii. ....
- iii. ....

3. Are the action plans (PDSA) developed by the team during the training shared with other Health Workers in the unit?  Yes  No

a. If no, why?

- i. ....
- ii. ....
- iii. ....
- iv. ....

4. Have the action plans been implemented?  Yes  No

a. Please comment on the response: If yes Status of implementation; if not state reasons

i. ....  
.....

ii. ....

iii. ....

5. What support, if any, did the Supervisor give in the implementation of the action plan?

a. ....

b. ....

c. ....

d. ....

6. Any comments from Trainee?

a. ....

b. ....

c. ....

d. ....

e. ....

7. Best Practices Observed

a. ....

b. ....

c. ....

d. ....

e. ....

**ACTION PLAN TEMPLATE: For developing an Action Plan for implementation to address identified gaps during follow-up visit**

Name of Facility: ..... Region: ..... District: ..... Date of visit: .....

Name of Lead Supervisor: ..... Cadre: ..... Contact Number: .....

Name of Facility In-charge/person met: ..... Cadre: ..... Contact Number: .....

| No. | Gaps/challenges identified | Action(s) taken by Supervisors | Action (s) to be taken by facility | Indicator (s) | Person Responsible | Person Accountable | When (specific date) |
|-----|----------------------------|--------------------------------|------------------------------------|---------------|--------------------|--------------------|----------------------|
| 1   |                            |                                |                                    |               |                    |                    |                      |
| 2   |                            |                                |                                    |               |                    |                    |                      |
| 3   |                            |                                |                                    |               |                    |                    |                      |
| 4   |                            |                                |                                    |               |                    |                    |                      |
| 5   |                            |                                |                                    |               |                    |                    |                      |

**Supplement to:** Asiedu A, Haws R, Gyasi A, et al. Improving malaria case management and referral relationships at the primary care level in Ghana: evaluation of a quality assurance internship. *Glob Health Sci Pract.* 2023;11(6):e2300050. <https://doi.org/10.9745/GHSP-D-23-00050>

**Supplement Table S1. HMIS Data Elements and Definitions**

| Data Element                                                                       | Definition                                                                                                                                                   | Data Source              |
|------------------------------------------------------------------------------------|--------------------------------------------------------------------------------------------------------------------------------------------------------------|--------------------------|
| Disease (New Cases Only)                                                           | A count of the number of the individual conditions clients present with that are to be reported. New cases only, does not include cases on review.           | Consulting room register |
| Uncomplicated Malaria Suspected                                                    | All Outpatient Department new cases that the that Clinician Suspects to be Malaria (including pregnant women)                                                | Consulting room register |
| Uncomplicated Malaria Suspected Tested                                             | Total number of suspected cases of malaria tested for malaria parasites (both rapid diagnostic tests and microscopy); including pregnant women               | Consulting room register |
| Uncomplicated Malaria Tested Positive                                              | Total number of suspected cases of malaria that tested positive for malaria parasites (both rapid diagnostic tests and microscopy); including pregnant women | Consulting room register |
| Uncomplicated Malaria not tested but Treated (Presumptive treatment)               | Total number of suspected cases of malaria that were clinically diagnosed and treated without testing (including pregnant women)                             | Consulting room register |
| Uncomplicated Malaria tested negative but Treated (Non-adherence to negative test) | Total number of Suspected cases of malaria that tested negative for malaria parasites (both RDTs and Microscopy) but were treated as malaria                 | Consulting room register |
| IPT 1                                                                              | Number of pregnant women given their first dose of SP at ANC                                                                                                 | ANC register             |
| IPT 2                                                                              | Number of pregnant women given their second dose of SP at ANC                                                                                                | ANC register             |
| IPT 3                                                                              | Number of pregnant women given their third dose of SP at ANC                                                                                                 | ANC register             |
| IPT 4                                                                              | Number of pregnant women given their fourth dose of SP at ANC                                                                                                | ANC register             |
| IPT 5                                                                              | Number of pregnant women given their fifth dose of SP at ANC                                                                                                 | ANC register             |
| ANC1                                                                               | Number of pregnant women reporting for antenatal care for the first time to any health facility with their current pregnancy.                                | ANC register             |
| Referral out                                                                       | Number of malaria cases referred out                                                                                                                         | Consulting room register |
| Pre-referral treatment using rectal artesunate (Under-5)                           | Number of severe malaria cases under 5 provided prereferral treatment with rectal artesunate                                                                 | Consulting room register |
| Confirmed cases                                                                    | Number of confirmed/positive malaria cases                                                                                                                   | Consulting room register |
| Number of confirmed cases treated with ACTs                                        | Number of positive malaria cases treated by ACT according to national guidelines                                                                             | Consulting room register |

Source: Monthly Outpatients Morbidity Returns in National HMIS SOP, 2020.

**Supplement to:** Asiedu A, Haws R, Gyasi A, et al. Improving malaria case management and referral relationships at the primary care level in Ghana: evaluation of a quality assurance internship. *Glob Health Sci Pract.* 2023;11(6):e2300050. <https://doi.org/10.9745/GHSP-D-23-00050>

**Supplement Table S2. Malaria Indicators Using HMIS Data Elements**

| <b>Indicator</b>                                                  | <b>Numerator data element</b>                            | <b>Denominator data element</b>        |
|-------------------------------------------------------------------|----------------------------------------------------------|----------------------------------------|
| Presumptive treatment                                             | Uncomplicated Malaria not tested but Treated             | Uncomplicated Malaria Suspected        |
| Non-adherence to negative test results                            | Uncomplicated Malaria tested negative but Treated        | Uncomplicated Malaria Suspected Tested |
| IPTp 3 Coverage                                                   | IPTp 3                                                   | ANC1                                   |
| Testing rate for suspected uncomplicated malaria                  | Uncomplicated Malaria Suspected Tested                   | Uncomplicated Malaria Suspected        |
| Percent of confirmed cases referred                               | Referral Out                                             | Confirmed cases                        |
| Percent of Under-5 Cases Given Appropriate Pre-Referral Treatment | Pre-referral treatment using rectal artesunate (Under-5) | Referral out (Under-5 only)            |
| Confirmed Cases Treated with ACTs Correctly                       | Number of confirmed malaria cases treated with ACTs      | Confirmed cases                        |
